# Supplementary material for: Biphosphinic ruthenium complexes as the promising antimicrobial agents
Source: Royal Society of Chemistry journal article supplement (doi:10.1039/d0nj03122d), 2020-01-01
Supplement: d0nj03122d1.pdf [file d0nj03122d1.pdf]

## Biphosphinic ruthenium complexes as new promising antimicrobial agents

Authors: Aurideia P. de Sousa<sup>a</sup>, Ana C. S. Gondim<sup>a</sup>, Eduardo H. S. Sousa<sup>a</sup>, Luiz Gonzaga de França Lopes<sup>a</sup>, Edson H. Teixeira<sup>b</sup>, Mayron A. Vasconcelos<sup>b,c</sup>, Patrícia H. R. Martins<sup>a</sup>, Elizabeth J. T. Medeiros<sup>b</sup>, Alzir A. Batista<sup>d</sup> and Alda K. M. Holanda<sup>a\*</sup>

Affiliations:

a. Departamento de Química Orgânica e Inorgânica, Universidade Federal do Ceará Cx. Postal 12200, Campus do Pici s/n, CEP 60440-900, Fortaleza - CE, Brazil

Fax: +55 85 33669978

b. Laboratório Integrado de Biomoléculas, Departamento de Patologia e Medicina Legal, Universidade Federal do Ceará, CEP 60430-270, Fortaleza - CE, Brazil.

c. Departamento de Ciências Biológicas, Faculdade de Ciências Exatas e Naturais, Universidade do Estado do Rio Grande do Norte, CEP: 59610-090, Mossoró, RN, Brazil.

d. Departamento de Química, Universidade Federal de São Carlos, CP 676, CEP: 13565-905 São Carlos, SP, Brazil

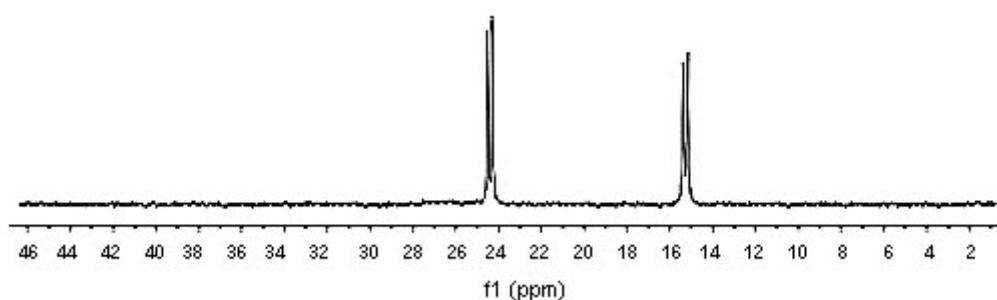

**Fig.S1** <sup>31</sup>P{<sup>1</sup>H} NMR spectroscopy of *ct*-[[RuCl(NO)(dppb)(4,4'-Mebipy)](PF<sub>6</sub>)<sub>2</sub> in CD<sub>2</sub>Cl<sub>2</sub> (500MHz,298 K).

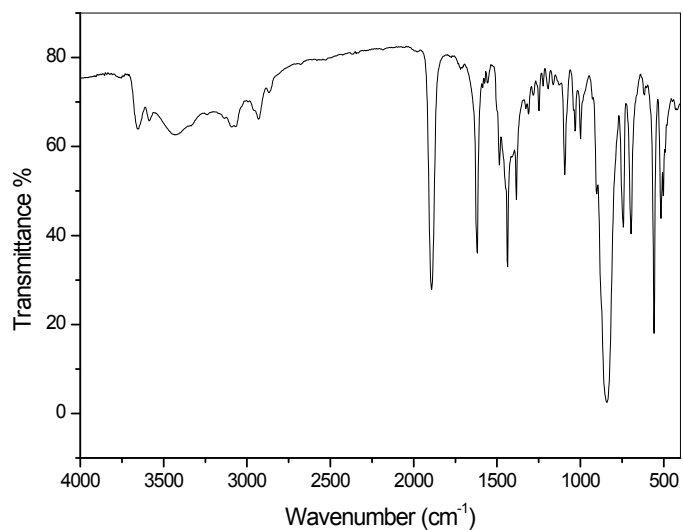

**Fig. S2** Infrared spectrum of complex  $ct$ -[RuCl(NO)(dppb)(4,4'-Mebipy)](PF<sub>6</sub>)<sub>2</sub> dispersed in KBr.

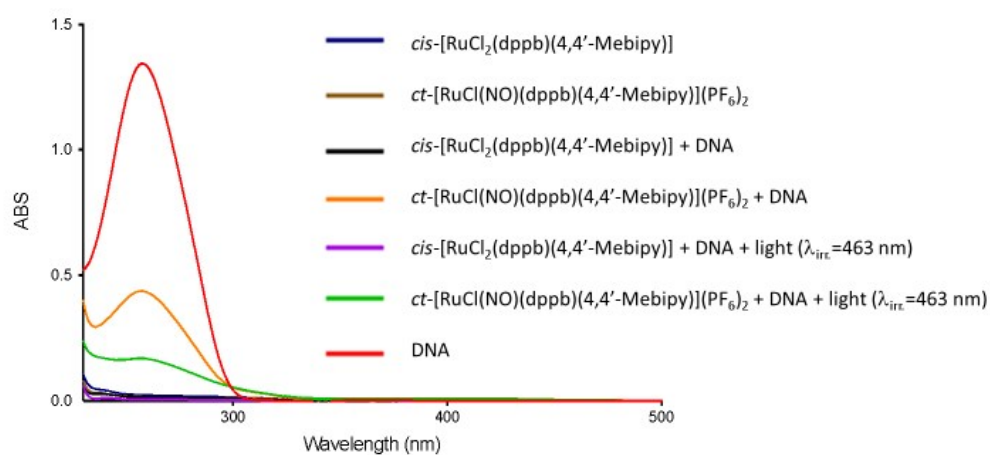

**Fig. S3** Electronic spectra for excluded samples upon treatment onto a biospin column P30.

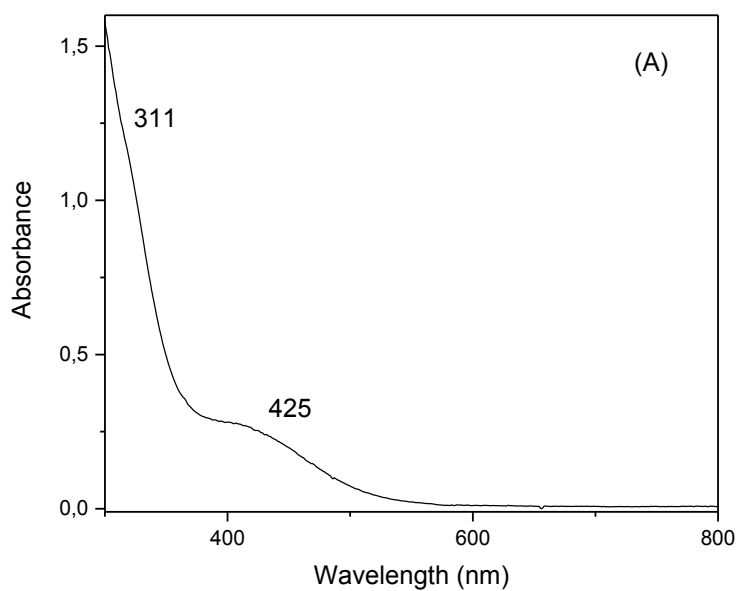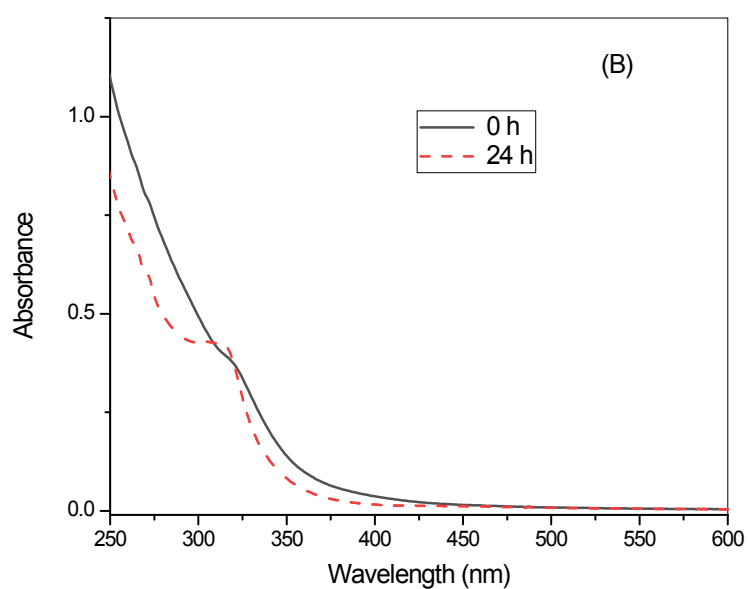

**Fig. S4** Thermal stability of compound **1**. (A) UV-vis spectra of *ct*-[RuCl(NO)(dppb)(4,4-Mebipy)](PF<sub>6</sub>)<sub>2</sub> (**1**), in DMSO/D<sub>2</sub>O (10%/90%), 1.9 × 10<sup>-4</sup> mol L<sup>-1</sup>. (B) Changes in the electronic spectrum of compound **1** related to thermally induced NO release which occur over 24 hours.
